# Supplementary material
Source: ML conference proceedings conference paper supplement (https://openreview.net/forum?id=u6Ibs4hTJH)
Supplement: supplementary_material [file attachment]

---

# Real-World Image Variation by Aligning Diffusion Inversion Chain – Appendix

---

Anonymous Author(s)  
Affiliation  
Address  
email

|    |                                                      |           |
|----|------------------------------------------------------|-----------|
| 1  | <b>Contents</b>                                      |           |
| 2  | <b>A Basic Background of Diffusion Models</b>        | <b>2</b>  |
| 3  | <b>B Details of the Attention Pipeline</b>           | <b>2</b>  |
| 4  | <b>C More About Comparisons</b>                      | <b>3</b>  |
| 5  | (1) Implementation Details. . . . .                  | 3         |
| 6  | (2) Comparison with UnCLIP. . . . .                  | 3         |
| 7  | (3) Additional Visual Results. . . . .               | 3         |
| 8  | <b>D Additional Ablation Results</b>                 | <b>3</b>  |
| 9  | (1) Ablation on early fusion step. . . . .           | 3         |
| 10 | (2) Ablation on different alignment designs. . . . . | 3         |
| 11 | (3) Ablation on different text conditions. . . . .   | 3         |
| 12 | <b>E Quantitative Evaluations</b>                    | <b>6</b>  |
| 13 | (1) CLIP Score. . . . .                              | 6         |
| 14 | (2) Color palette matching. . . . .                  | 6         |
| 15 | (3) User study. . . . .                              | 6         |
| 16 | (4) KID evaluation. . . . .                          | 6         |
| 17 | <b>F Additional Considerations</b>                   | <b>7</b>  |
| 18 | (1) Correction of an equation error. . . . .         | 7         |
| 19 | (2) Data acquisition. . . . .                        | 9         |
| 20 | (3) Societal impacts. . . . .                        | 9         |
| 21 | <b>Reference</b>                                     | <b>10</b> |

## 22 A Basic Background of Diffusion Models

23 This section uses a modified background description provided in [5]. We only consider the condition-  
 24 free case for the diffusion model here. Diffusion Denoising Probabilistic Models (DDPMs) [3] are  
 25 generative latent variable models designed to approximate the data distribution  $q(x_0)$ . The diffusion  
 26 operation starts from the latent  $x_0$ , adding step-wise noise to diffuse data into pure noise  $x_T$ . It's  
 27 important to note that this process can be viewed as a Markov chain starting from  $x_0$ , where noise is  
 28 gradually added to the data to generate the latent variables  $x_1, \dots, x_T \in \bar{X}$ . The sequence of latent  
 29 variables follows the conditional distribution  $q(x_1, \dots, x_t | x_0) = \prod_{i=1}^t q(x_i | x_{i-1})$ . Each step in  
 30 the forward process is defined by a Gaussian transition  $q(x_t | x_{t-1}) := \mathcal{N}(x_t; \sqrt{1 - k_t}x_{t-1}, k_t I)$ ,  
 31 which is parameterized by a schedule  $k_0, \dots, k_T \in (0, 1)$ . As  $T$  becomes sufficiently large, the final  
 32 noise vector  $x_T$  approximates an isotropic Gaussian distribution.

33 The forward process allows us to express the latent variable  $x_t$  directly as a linear combination of  
 34 noise and  $x_0$ , without the need to sample intermediate latent vectors.

$$x_t = \sqrt{\alpha_t}x_0 + \sqrt{1 - \alpha_t}w, \quad w \sim \mathcal{N}(\mathbf{0}, \mathbf{I}), \quad (11)$$

35 where  $\alpha_t := \prod_{i=1}^t (1 - k_i)$ . To sample from the distribution  $q(x_0)$ , a reversed denoising process is  
 36 defined by sampling the posteriors  $q(x_{t-1} | x_t)$ , which connects isotropic Gaussian noise  $x_T$  to the  
 37 actual data. However, the reverse process is computationally challenging due to its dependence on the  
 38 unknown data distribution  $q(x_0)$ . To overcome this obstacle, an approximation of the reverse process  
 39 with a parameterized Gaussian transition network denoted as  $p_\theta(x_{t-1} | x_t)$ , where  $p_\theta(x_{t-1} | x_t)$   
 40 follows a normal distribution with mean  $\mu_\theta(x_t, t)$  and covariance  $\Sigma_\theta(x_t, t)$ . As an alternative  
 41 approach, the prediction of the noise  $\epsilon_\theta(x_t, t)$  added to  $x_0$ , which is obtained using equation 11, can  
 42 replace the use of  $\mu_\theta(x_t, t)$  as suggested in [3]. Bayes' theorem could be applied to approximate

$$\mu_\theta(x_t, t) = \frac{1}{\sqrt{\alpha_t}} \left( x_t - \frac{k_t}{\sqrt{1 - \alpha_t}} \epsilon_\theta(x_t, t) \right). \quad (12)$$

43 Once we have a trained  $\epsilon_\theta(x_t, t)$ , we can use the following sample method

$$x_{t-1} = \mu_\theta(x_t, t) + \sigma_t z, \quad z \sim \mathcal{N}(\mathbf{0}, \mathbf{I}). \quad (13)$$

44 In DDIM sampling [11], a denoising process could become deterministic when set  $\sigma_t = 0$ .

## 45 B Details of the Attention Pipeline

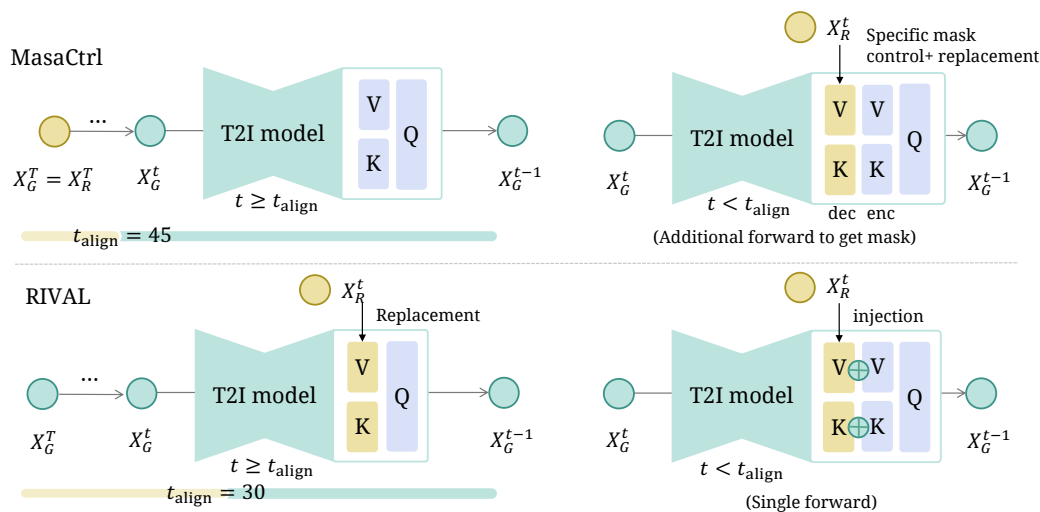

Figure 11: Self-attention control compare with MasaCtrl [2]. The default split of two stages is shown as a bar for each method.

46 We present a comparative analysis of attention injection methods. As depicted in Fig. 11, MasaCtrl [2],  
 47 while also adopting a self-attention injection approach, employs a more complex control mechanism

48 in its second stage. In the first stage of MasaCtrl, the inverted latent representation  $X_T^R$  is directly  
49 utilized by applying a modified prompt. In the second stage, a cross-attention mask is introduced to  
50 control specific word concepts modified in the prompt, which requires an additional forward pass.  
51 In contrast, our proposed method, RIVAL, primarily focuses on generating inconsistent variations.  
52 Consequently, we aim to guide feature interaction by replacing  $KV$  features with an aligned latent  
53 distribution. Unlike MasaCtrl, our approach does not limit content transfer through editing prompts  
54 with only a few words. Hence, in the second stage, we employ a single forward pass without  
55 calculating an additional cross-attention mask, allowing fast and flexible text-to-image generation  
56 with diverse text prompts.

57 In recent updates, ControlNet [15] has incorporated an attention mechanism resembling the second  
58 stage of RIVAL to address image variation. However, a notable distinction lies in using vanilla noised  
59 latents as guidance, leading to a process akin to the attention-only approach employed in RePaint [4]  
60 with the Stable Diffusion model. Consequently, this methodology is limited to generating images  
61 within the fine-tuned training data domain.

## 62 C More About Comparisons

63 **Implementation Details.** We compare our work with ELITE [14], Stable Diffusion image vari-  
64 ation [6], and DALL·E 2 [8]. We utilize the official demo of ELITE to obtain results. To extract  
65 context tokens, we mask the entire image and employ the phrase "*A photo/painting of <S>*." based  
66 on the production method of each test image. Inference for ELITE employs the default setting with  
67 denoising steps set to  $T = 300$ . For Stable Diffusion’s image variation version, we utilize the default  
68 configuration, CFG guidance  $m = 3$ , and denoising steps  $T = 50$ . In the case of DALL·E 2, we  
69 utilize the official image variation API, specifically requesting using the most advanced API available  
70 to generate images of size  $1024 \times 1024$ .

71 **Comparison with UnCLIP.** UnCLIP [8], also known as DALL·E 2, is an image generation  
72 framework trained using image CLIP features as direct input. Thanks to its large-scale training and  
73 image-direct conditioning design, it generates variations solely based on image conditions when  
74 adapted to image variation. However, when faced with hybrid image-text conditions, image-only  
75 UnCLIP struggles to produce satisfactory results, particularly when CLIP does not recognize the  
76 image content correctly. We provide comparative analysis in Fig. 12. Additionally, we demonstrate  
77 in the last two columns of Figure 12 that our approach can enhance the accuracy of low-level details  
78 in open-source image variation methods such as SD image variation [6].

79 **Additional Visual Results.** We showcase additional results of our techniques in variation generation,  
80 as illustrated in Fig. 13, and text-driven image generation with image condition, as shown in Fig. 14.  
81 The results unequivocally demonstrate the efficacy of our approach in generating a wide range of  
82 image variations that accurately adhere to textual and visual guidance.

## 83 D Additional Ablation Results

84 **Ablation on early fusion step.** In addition to Fig. 8 of the main paper, we present comprehensive  
85 early-step evaluation results based on a grid search analysis in Fig. 15. By decreasing the duration  
86 of the feature replacement stage (larger  $t_{\text{align}}$ ), we observe an increase in the similarity of textures  
87 and contents in the generated images. However, excessively long or short early latent alignment  
88 durations ( $t_{\text{early}}$ ) can lead to color misalignment. Users can adjust the size of the early fusion steps  
89 as hyperparameters to achieve the desired outcomes.

90 **Ablation on different alignment designs.** Fig. 16 illustrates ablations conducted on various  
91 alignment designs. Two latent initialization methods, as formulated in Eq. (7) and Eq. (8), exhibit  
92 comparable performance. Nevertheless, incorporating alignments in additional areas, such as hidden  
93 states within each transformer block, may harm performance. Hence, we opt for our RIVAL pipeline’s  
94 simplest noise alignment strategy.

95 **Ablation on different text conditions.** We conduct ablations on text conditions in three aspects.  
96 First, we evaluate the impact of different CFG scales  $m$  for text prompt guidance. As shown  
97 in Fig. 17 (a), our latent rescaling technique enables control over the text guidance level while  
98 preserving the reference exemplar’s low-level features. Second, we employ an optimization-based

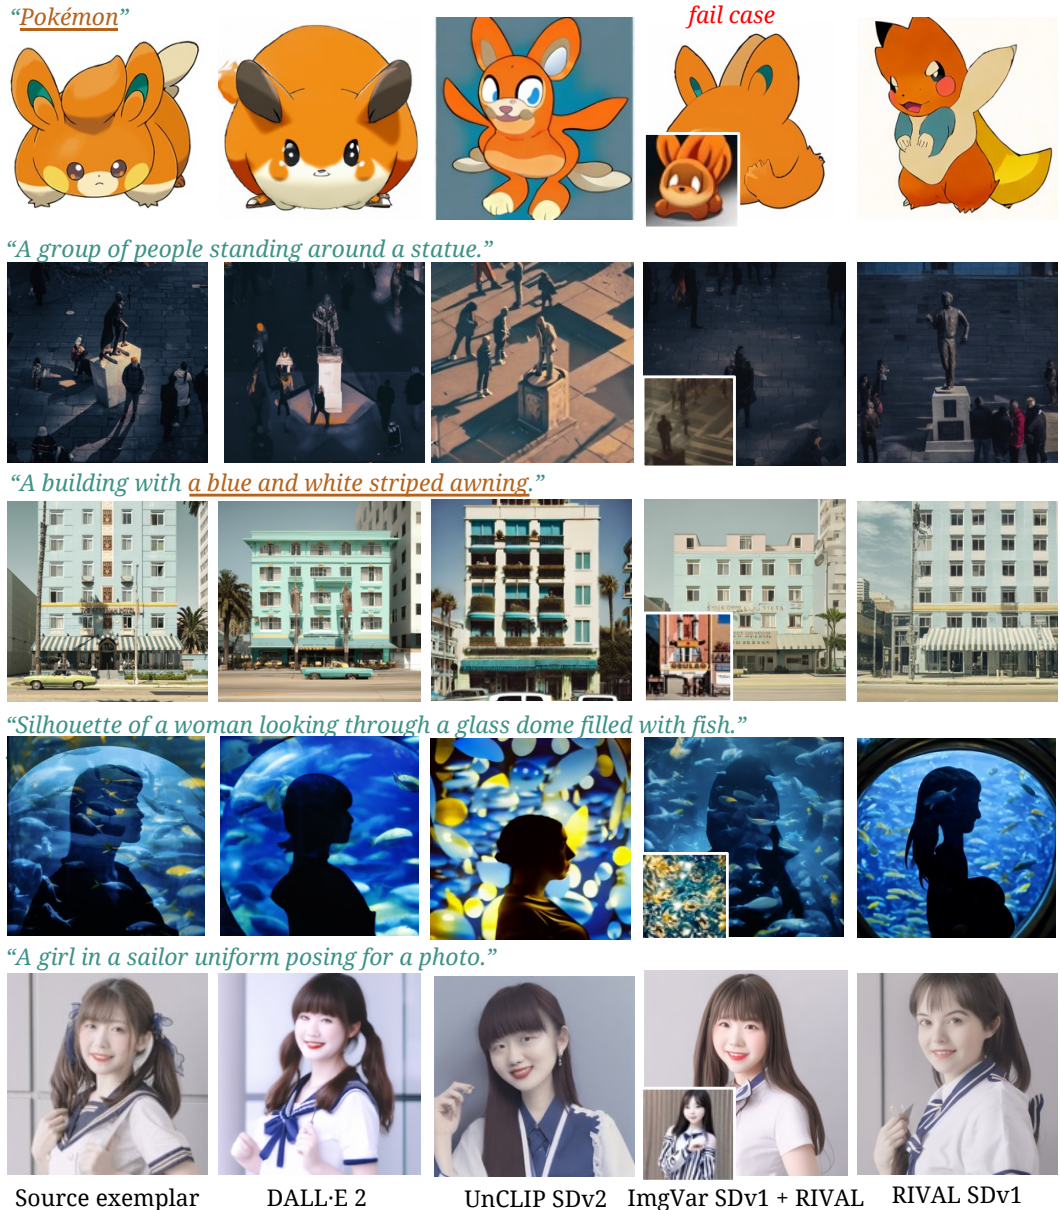

Figure 12: Comparison and adaptation with UnCLIP [8]. We **highlight texts** that enhance the image understanding for each case. Our inference pipeline is adapted to the image variation model depicted in the fourth column, in contrast to the variation achieved through vanilla inference in the bottom left corner of each image.

99 null-text inversion method [5] to obtain an inversion chain with improved reconstruction quality.  
 100 However, this method is computationally intensive, and the optimized embeddings are sensitive to the  
 101 guidance scale. Furthermore, when incorporating this optimized embedding into the unconditional  
 102 inference branch, there is a variation in generation quality, as depicted in Fig. 17 (b). Third, we  
 103 utilize empty text as the source prompt to obtain the latents in the inversion chain while keeping the  
 104 target prompt unchanged. As depicted in Fig. 17 (c), the empty text leads to weak semantic content  
 105 correspondence between the two chains but sometimes benefits text-driven generation. For example,  
 106 if users do not want to transfer the "gender" concept to the generated robot.

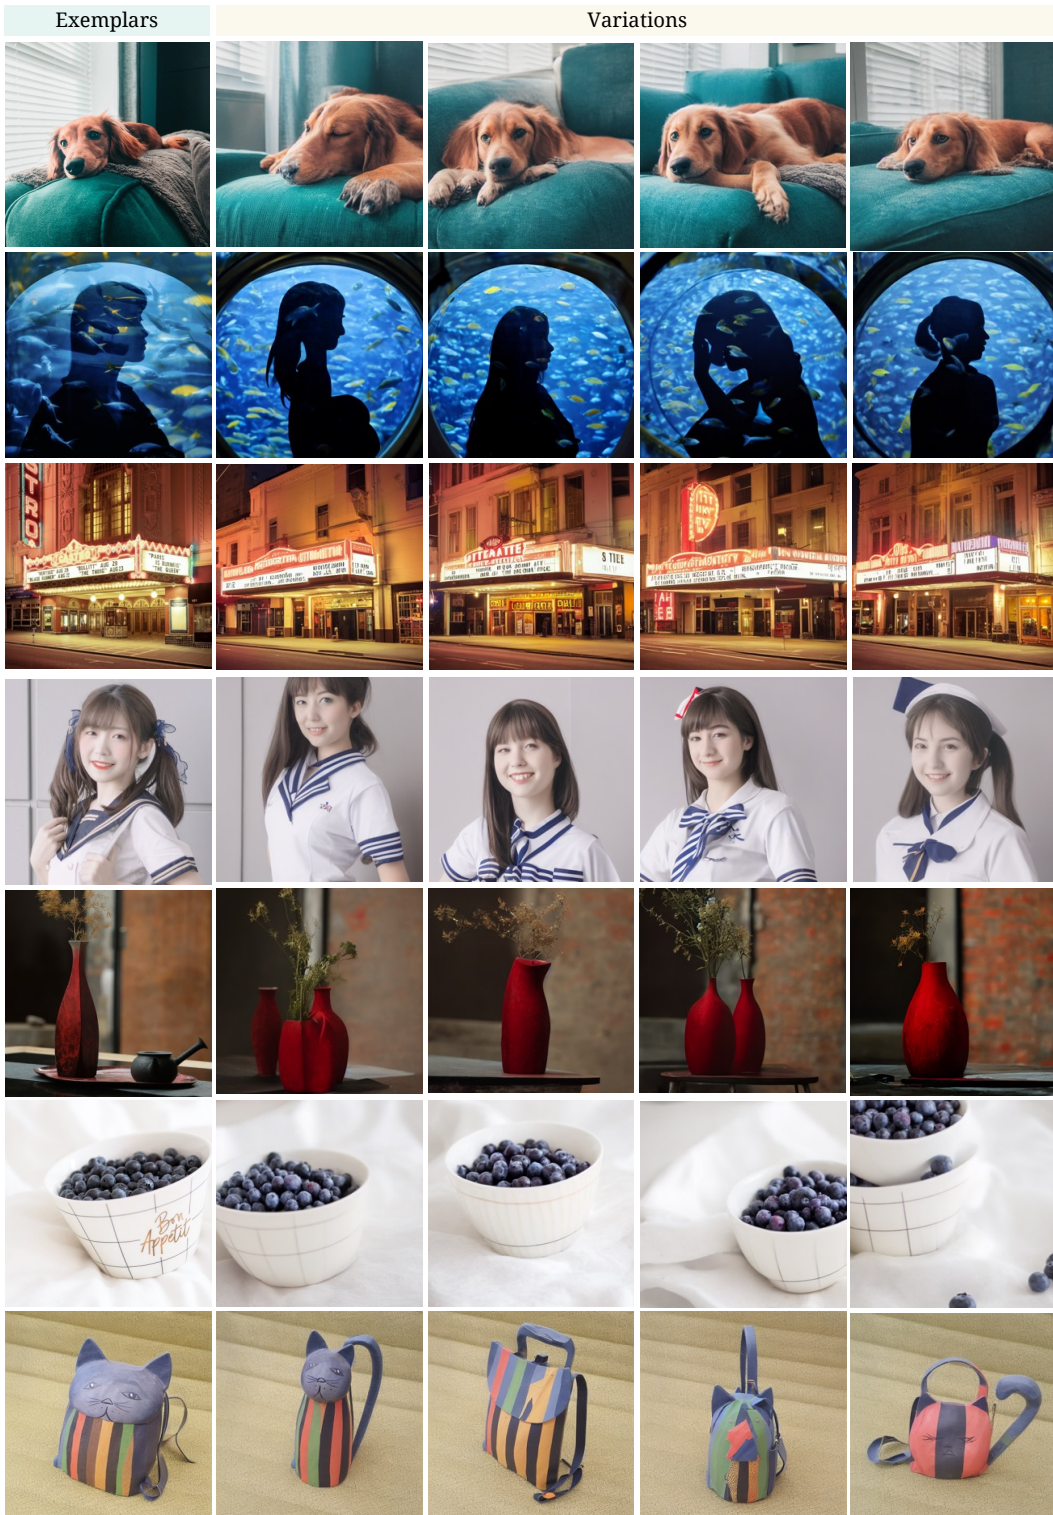

Figure 13: Text-driven free-form image generation results. The image reference is in the left column. In the last row, we also present variations for one customized concept `<sk>` bag.

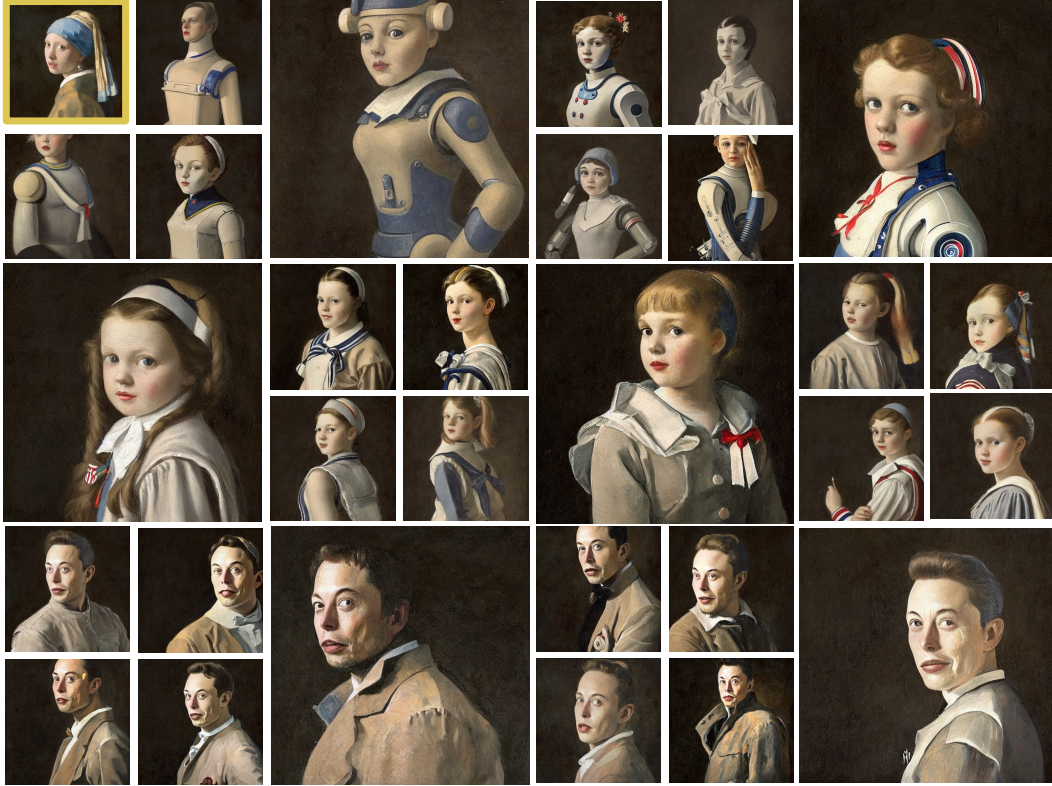

Figure 14: Text-driven free-form image generation results, with the image reference placed in the top left corner. The text prompts used are identical to those presented in Fig. 5 of the main paper. Every two rows correspond to a shared text prompt.

| method     | SD [9] | ImgVar [6] | ELITE [14] | UnCLIP [8] | RIVAL       |
|------------|--------|------------|------------|------------|-------------|
| base model | V1-5   | V1-3       | V1-4       | V2-1       | V1-5        |
| KID ↓      | 17.1   | 18.5       | 25.7       | 13.5       | <b>13.2</b> |

Table 2: Quantitative comparisons for KID ( $\times 10^3$ ). All methods are Stable Diffusion based.

## 107 E Quantitative Evaluations

108 This section comprehensively evaluates our proposed method with various carefully designed metrics,  
 109 including CLIP Score, color palette matching, user study, and KID.

110 **CLIP Score.** For evaluating the CLIP Score, we employ the official ViT-Large-Patch14 CLIP  
 111 model [7] and compute the cosine similarity between the projected features, yielding the output.

112 **Color palette matching.** To perform low-level matching, we utilize the Pylette tool [12] to extract a  
 113 set of 10 palette colors. Subsequently, we conduct a bipartite matching between the color palette of  
 114 each generated image and the reference palette colors in the RGB color space. Before matching, each  
 115 color is scaled to  $[0, 1]$ . The matching result is obtained by calculating the sum of L1 distances.

116 **User study.** To evaluate the effectiveness of our approach against other methods, we conducted a  
 117 user study using an online form. The user study interface, depicted in Figure 18, was designed to elicit  
 118 user rankings of image variation results. We collected 41 questionnaire responses, encompassing 16  
 119 cases of ranking comparisons.

120 **KID evaluation.** To provide a comprehensive assessment of the quality, we utilize Kernel Inception  
 121 Distance (KID)[1] to evaluate the perceptual generation quality of our test set. As depicted in Table 2,  
 122 with Stable Diffusion V1-5, our method achieves the best KID score, which is slightly superior to the  
 123 UnCLIP [8], employing the advanced Stable Diffusion V2-1.

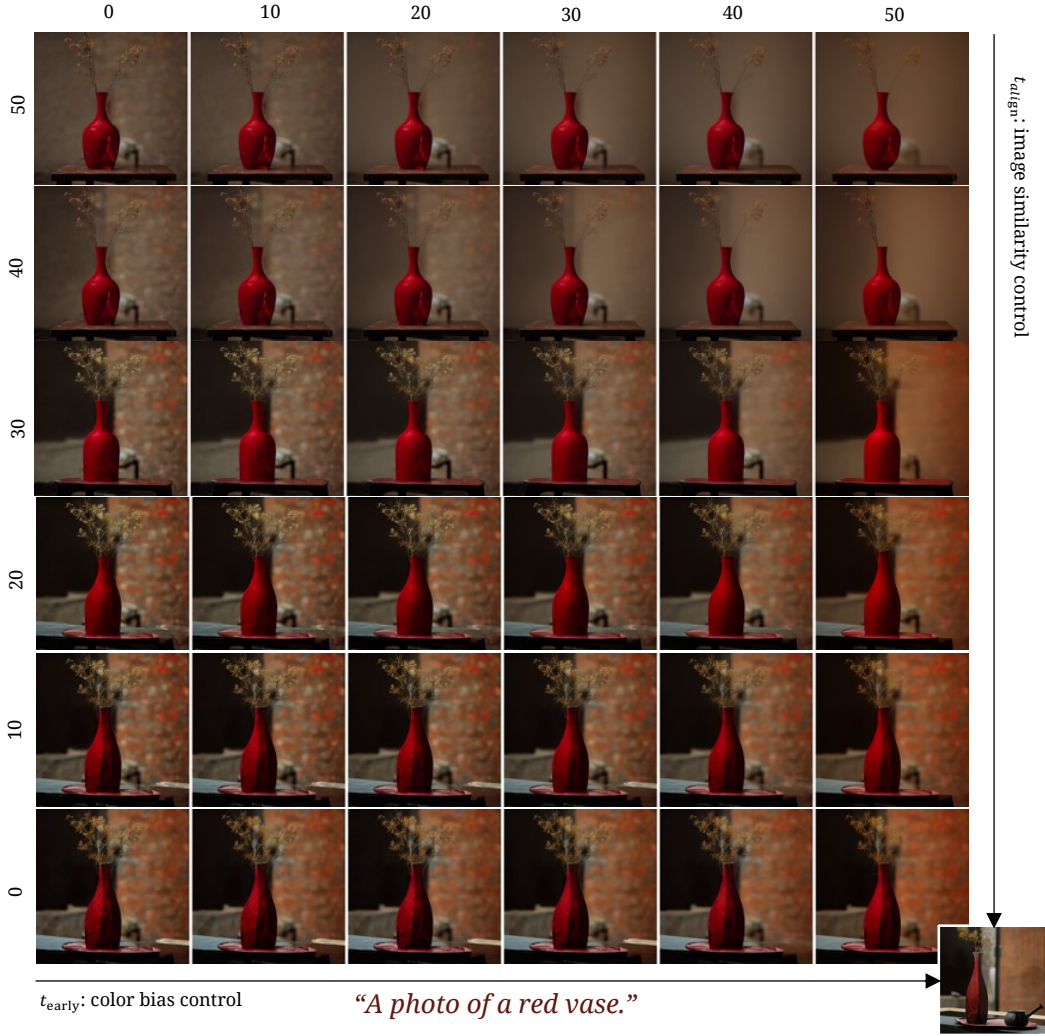

Figure 15: Ablation results for alignment steps, with the reference exemplar at the bottom right. We fix each generation’s initial latent  $X_G^T$ .

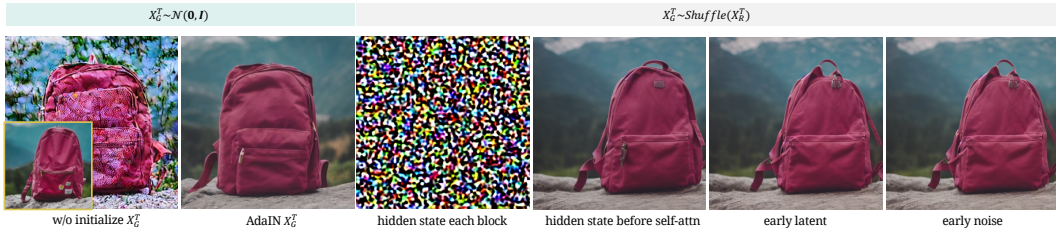

Figure 16: Ablation studies for different feature alignment strategies.

## 124 F Additional Considerations

125 **Correction of an equation error in the main paper.** In the main paper, it has been identified that an  
 126 error exists in Equation (4). The residual should be applied after completing the entire self-attention  
 127 process. Therefore, the updated output of the hidden state in the self-attention mechanism is expressed  
 128 as follows:

$$\mathbf{v}_G^* = \text{softmax}\left(\frac{QK^\top}{\sqrt{d_k}}\right)V. \quad (14)$$

129 We will correct this equation in the updated version of the main paper.

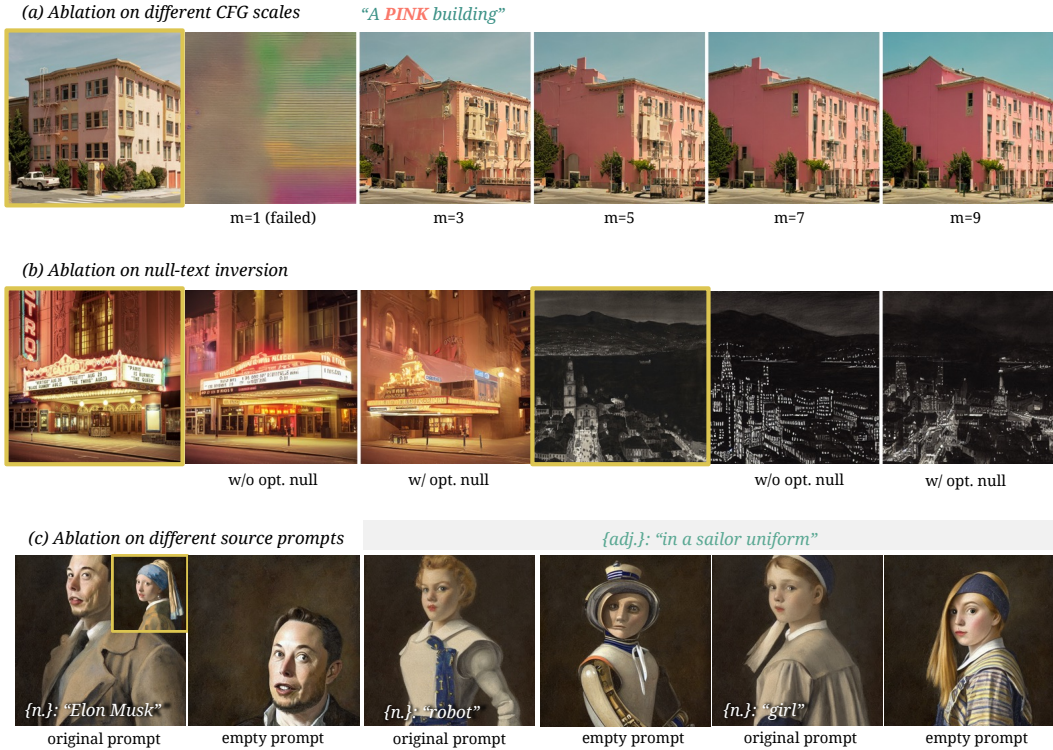

Figure 17: Ablation studies on different text conditions and guidance scales. Reference exemplars are highlighted with a golden border.

**\* 01 Specification**

Thank you for taking part in this survey. For each question in this questionnaire, we will provide a reference image, a corresponding text description, and image results generated using four methods based on these two conditions. For each case, please rank the four methods from high to low based on two aspects:

1. **image authenticity (how difficult it is to distinguish from images in the real world (photo/painting))** and
2. **the degree of matching with the given conditions (both the reference image and the text prompt).**

I understood.

(a) Specification

**\* 02 [Image authenticity]** An old black and white drawing of a city

(b) Shuffled results

Drag the right option or click to the left to sort

A

B

C

D

**\* 03 [Condition matching]** An old black and white drawing of a city

Drag the right option or click to the left to sort

A

B

C

D

(c) Ranking questions

Figure 18: User study user interface. In this case, four methods are: (A). SD ImageVar [6], (B). ELITE [14], (C). DALL-E 2[8], (D). RIVAL (ours).



130 **Data acquisition.** To comprehensively evaluate our method, we collected diverse source exemplars  
131 from multiple public datasets, such as DreamBooth [10] and Interactive Video Stylization [13]. Some  
132 exemplars were obtained from Google and Behance solely for research purposes. We will not release  
133 our self-collected example data due to license restrictions.

134 **Societal impacts.** This paper introduces a novel framework for image generation that leverages  
135 a hybrid image-text condition, facilitating the generation of diverse image variations. Although  
136 this application has the potential to be misused by malicious actors for disinformation purposes,  
137 significant advancements have been achieved in detecting malicious generation. Consequently, we  
138 anticipate that our work will contribute to this domain. In forthcoming iterations of our method, we  
139 intend to introduce the NSFW (Not Safe for Work) test for detecting possible malicious generations.  
140 Through rigorous experimentation and analysis, our objective is to enhance comprehension of image  
141 generation techniques and alleviate their potential misuse.

142 **References**

- 143 [1] Mikołaj Bińkowski, Danica J Sutherland, Michael Arbel, and Arthur Gretton. Demystifying mmd gans.  
144 *arXiv preprint arXiv:1801.01401*, 2018. 6
- 145 [2] Mingdeng Cao, Xintao Wang, Zhongang Qi, Ying Shan, Xiaohu Qie, and Yinqiang Zheng. Masactrl:  
146 Tuning-free mutual self-attention control for consistent image synthesis and editing. *arXiv preprint*  
147 *arXiv:2304.08465*, 2023. 2
- 148 [3] Jonathan Ho, Ajay Jain, and Pieter Abbeel. Denoising diffusion probabilistic models. *NeurIPS*, 33:6840–  
149 6851, 2020. 2
- 150 [4] Andreas Lugmayr, Martin Danelljan, Andres Romero, Fisher Yu, Radu Timofte, and Luc Van Gool.  
151 Repaint: Inpainting using denoising diffusion probabilistic models. In *CVPR*, pages 11461–11471, June  
152 2022. 3
- 153 [5] Ron Mokady, Amir Hertz, Kfir Aberman, Yael Pritch, and Daniel Cohen-Or. Null-text inversion for editing  
154 real images using guided diffusion models. *arXiv preprint arXiv:2211.09794*, 2022. 2, 4
- 155 [6] Justin Pinkney. Experiments with stable diffusion. [https://github.com/justinpinkney/  
156 stable-diffusion](https://github.com/justinpinkney/stable-diffusion), 2023. 3, 6, 8
- 157 [7] Alec Radford, Jong Wook Kim, Chris Hallacy, Aditya Ramesh, Gabriel Goh, Sandhini Agarwal, Girish  
158 Sastry, Amanda Askell, Pamela Mishkin, Jack Clark, et al. Learning transferable visual models from  
159 natural language supervision. In *ICML*, pages 8748–8763. PMLR, 2021. 6
- 160 [8] Aditya Ramesh, Prafulla Dhariwal, Alex Nichol, Casey Chu, and Mark Chen. Hierarchical text-conditional  
161 image generation with clip latents. *arXiv preprint arXiv:2204.06125*, 2022. 3, 4, 6, 8
- 162 [9] Robin Rombach, Andreas Blattmann, Dominik Lorenz, Patrick Esser, and Björn Ommer. High-resolution  
163 image synthesis with latent diffusion models. In *CVPR*, pages 10684–10695, 2022. 6
- 164 [10] Nataniel Ruiz, Yuanzhen Li, Varun Jampani, Yael Pritch, Michael Rubinstein, and Kfir Aberman. Dream-  
165 booth: Fine tuning text-to-image diffusion models for subject-driven generation. In *CVPR*, 2023. 9
- 166 [11] Jiaming Song, Chenlin Meng, and Stefano Ermon. Denoising diffusion implicit models. In *ICLR*, 2021. 2
- 167 [12] Ivar Stangeby. A python library for extracting color palettes from supplied images. [https://github.  
168 com/qTipTip/Palette](https://github.com/qTipTip/Palette), 2022. 6
- 169 [13] Ondřej Texler, David Futschik, Michal Kučera, Ondřej Jamriška, Šárka Sochorová, Mencei Chai, Sergey  
170 Tulyakov, and Daniel Šykora. Interactive video stylization using few-shot patch-based training. *ACM*  
171 *Transactions on Graphics (TOG)*, 39(4):73–1, 2020. 9
- 172 [14] Yuxiang Wei, Yabo Zhang, Zhilong Ji, Jinfeng Bai, Lei Zhang, and Wangmeng Zuo. Elite: Encod-  
173 ing visual concepts into textual embeddings for customized text-to-image generation. *arXiv preprint*  
174 *arXiv:2302.13848*, 2023. 3, 6, 8
- 175 [15] Lvmin Zhang and Maneesh Agrawala. Adding conditional control to text-to-image diffusion models. *arXiv*  
176 *preprint arXiv:2302.05543*, 2023. 3
